# Supplementary material
Source: PubMed Central journal article supplement (PMC5780235)
Supplement: NIHMS924016-supplement-1.pdf [file NIHMS924016-supplement-1.pdf]

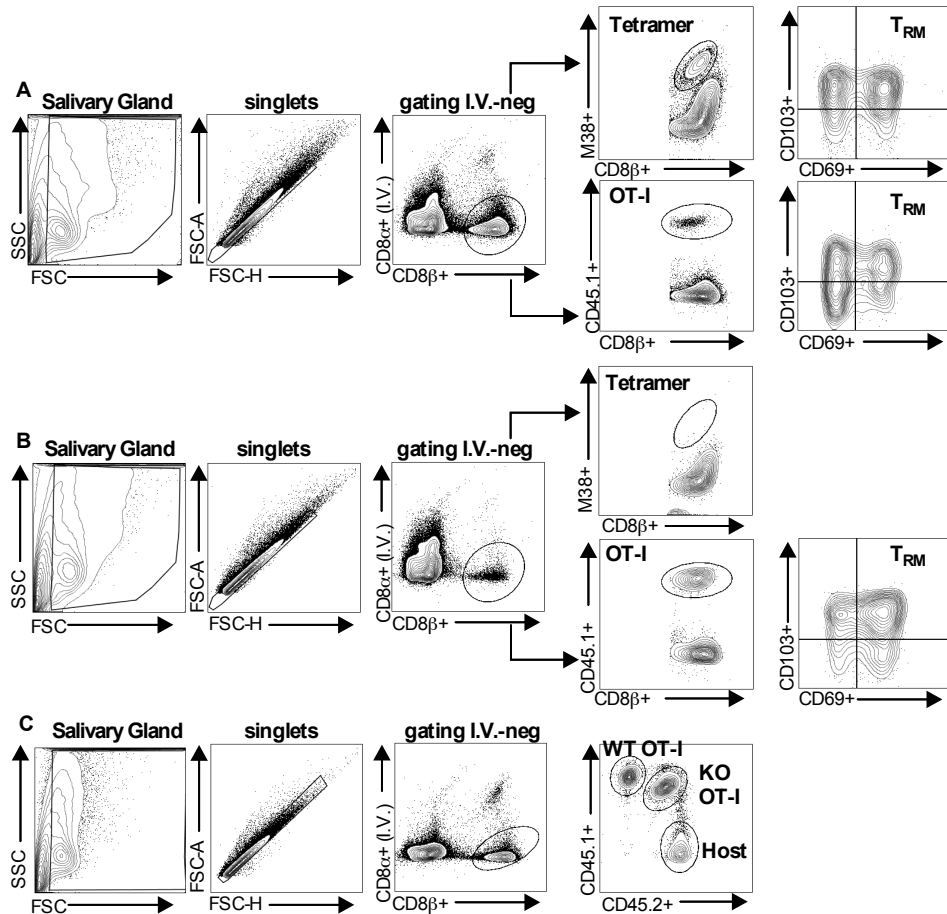

### Sup. Fig. 1. Representative Gating

(A) Gating strategy used to identify CD8<sup>+</sup> T cells in the parenchyma of the salivary gland. After a broad lymphocyte gate, singlets were selected by FSC-H vs FSC-A and the CD8 $\beta$ <sup>+</sup> T cells that were not intravenous (I.V.) CD8 $\alpha$  antibody were selected. From the I.V. negative CD8 $\beta$ <sup>+</sup> population, MCMV-specific T cells were identified by tetramer-binding (shown are M38-specific T cells) and OT-Is were identified by expression of the congenic marker (CD45.1, CD45.2 or Thy1.1). The T<sub>RM</sub> CD8<sup>+</sup> cells were characterized by the expression of CD69 and CD103. (B) Representative gating strategy for detection of OT-I T cells in naive mice as in A. (C) Representative gating (as in A) of two congenically-marked OT-I populations in the same recipient.

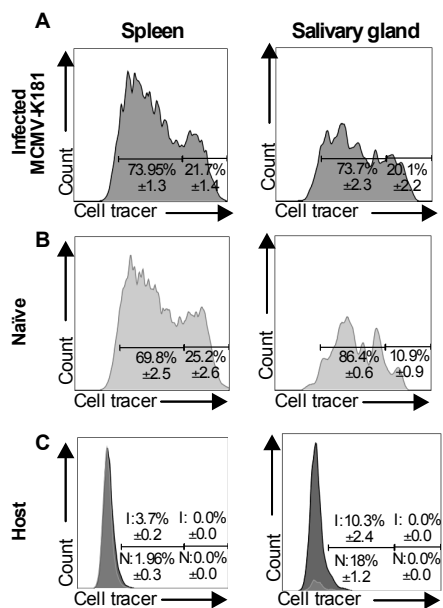

**Sup. Fig. 2 - *In vitro* activated OT-Is dilute cell tracer dye similarly in both naïve and MCMV infected mice.**

The experiment was performed as described in fig. 3. OT-Is were labelled with cell tracer violet before transfer to naïve mice or mice infected with MCMV for 11 days. Concatenated FACS plots from the OT-I T cells in the infected (A) or naïve (B) recipients. (C) Data from host CD8 $\beta$ <sup>+</sup> T cells, as a control. Plots show host cells in the infected (I-dark grey) and naïve (N - Light grey) recipients. Frequencies  $\pm$  SEM were represented from one experiment (n=2-3). No differences between infected and naïve animals were observed in a second experiment using CFSE labeling (data not shown).
